# Supplementary material for: Observation of field-induced single-ion magnet behavior in an octahedral dysprosium complex with a strong ligand field
Source: Royal Society of Chemistry journal article supplement (doi:10.1039/d0nj05398h), 2021-01-01
Supplement: d0nj05398h1.pdf [file d0nj05398h1.pdf]

## **Observation of field-induced single-ion magnet behavior in an octahedral dysprosium complex with strong ligand field**

Chunyang Zhang,<sup>a</sup> Mengyao Liu,<sup>a</sup> Xingwei Cai,<sup>\*a</sup> Lei Chen,<sup>\*a</sup> Yuan-Zhong Liu,<sup>\*b,c</sup>  
Huihui Cui,<sup>d</sup> Shao-Liang Zhang,<sup>\*e</sup> and Aihua Yuan<sup>\*a</sup>

*<sup>a</sup>State of Environmental and Chemical Engineering, Jiangsu University of Science and Technology, Zhenjiang 212003, P. R. China;*

*<sup>b</sup>Suzhou Institute of Biomedical Engineering and Technology, Chinese Academy of Sciences, Suzhou 215163, P. R. China;*

*<sup>c</sup>Jinan Guoke Medical Technology Development Co., Ltd., Jinan 250100, P. R. China;*

*<sup>d</sup>School of Chemistry and Chemical Engineering, Nantong University, Jiangsu 226019, P. R. China;*

*<sup>e</sup>Institution of Functional Organic Molecules and Materials, School of Chemistry and Chemical Engineering, Liaocheng University, Liaocheng 252059, P. R. China.*

### **Supporting Information**

**Table S1** The results of the continuous shape measure (CSM) analyses for **1** by using SHAPE software.

| CSM      | Hexagon | Pentagonal pyramid | Octahedron | Trigonal prism |
|----------|---------|--------------------|------------|----------------|
| <b>1</b> | 32.280  | 21.074             | 2.461      | 7.507          |

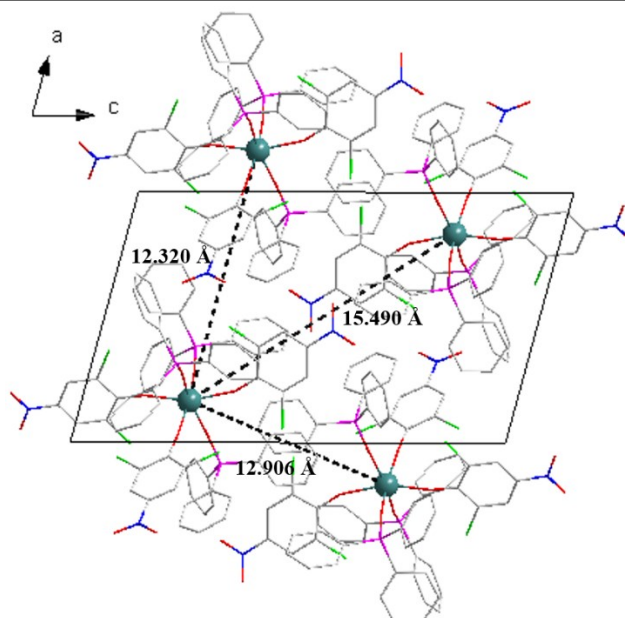

**Figure S1** Crystal packing of **1** along the b axis. The H atoms are omitted for clarity.

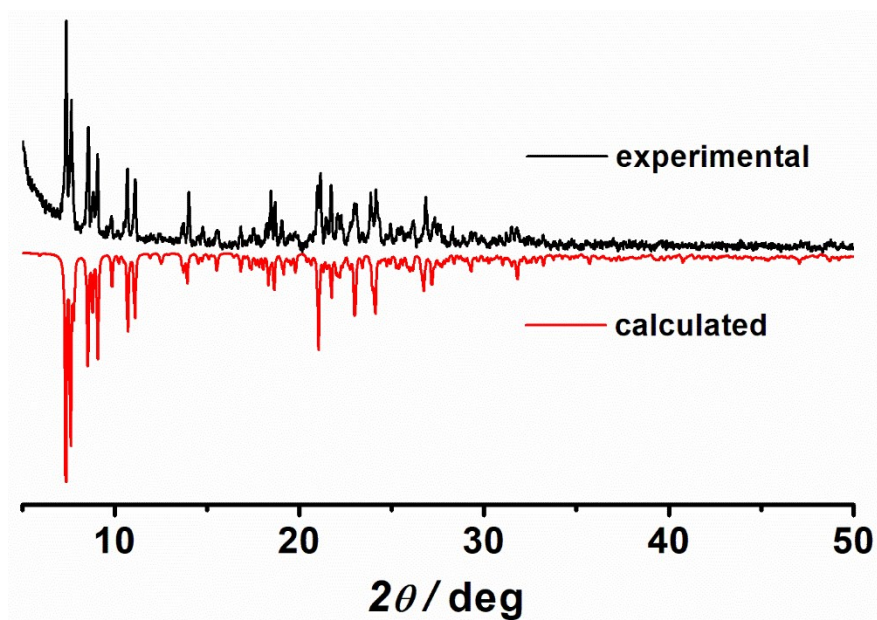

**Figure S2** The XRD patterns for complex **1**.

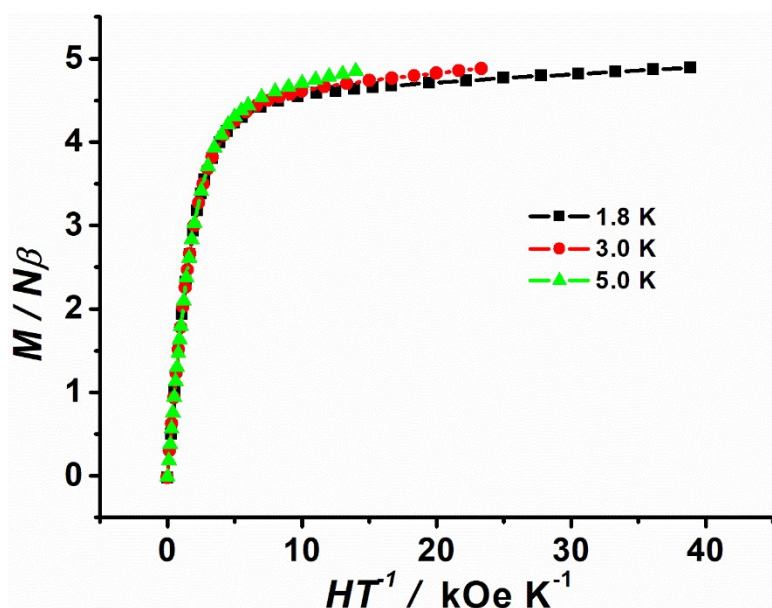

**Figure S3** Variable-temperature, variable-field dc magnetization data of **1**. The solid lines are a guide for the eye.

**Table S2** Crystal field parameters for **1** fitted from  $\chi_M T$  vs.  $T$  and  $M$  vs.  $H$  simultaneously.

|          | $B_0^2$ | $B_0^4$ | $B_2^4$ |
|----------|---------|---------|---------|
| <b>1</b> | -275    | 321     | -695    |

**Table S3** Energy levels and  $g$  for **1** simulated from crystal field parameters in Table S2.

| KDs | <b>1</b>           |         |
|-----|--------------------|---------|
|     | $E/\text{cm}^{-1}$ | $g$     |
| 1   | 0                  | 0.2038  |
|     |                    | 0.5845  |
|     |                    | 18.5065 |
| 2   | 175                | 2.2847  |
|     |                    | 6.0090  |
|     |                    | 10.7762 |
| 3   | 232                | 0.0087  |
|     |                    | 0.0181  |
|     |                    | 19.6678 |
| 4   | 293                | 3.0319  |
|     |                    | 3.9220  |
|     |                    | 6.0918  |
| 5   | 436                | 0.0983  |
|     |                    | 0.17141 |

|   |     |         |
|---|-----|---------|
|   |     | 9.7457  |
| 6 | 501 | 0.0056  |
|   |     | 0.0060  |
|   |     | 14.7840 |
|   |     | 0.0001  |
| 7 | 705 | 0.0047  |
|   |     | 14.4986 |
|   |     | 0.0012  |
| 8 | 722 | 0.0049  |
|   |     | 14.5466 |
|   |     |         |

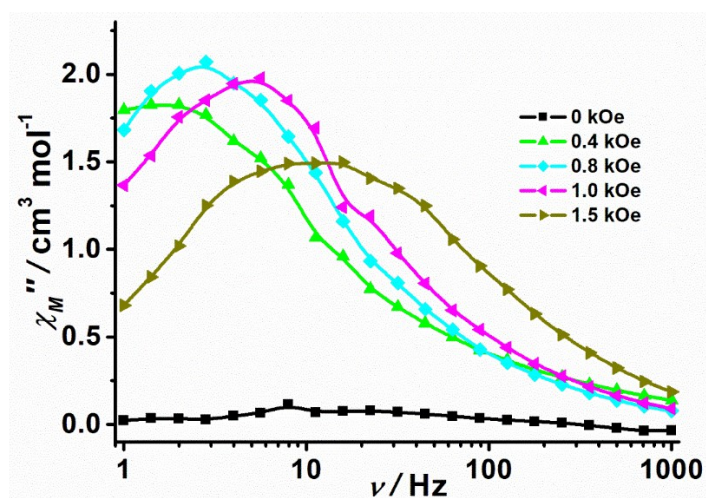

**Figure S4** Frequency dependence of out-of-phase ( $\chi_M''$ ) ac susceptibility at 1.8 K under the different applied static fields from 0 to 1.5 kOe for **1**. The solid lines are for eye guide.

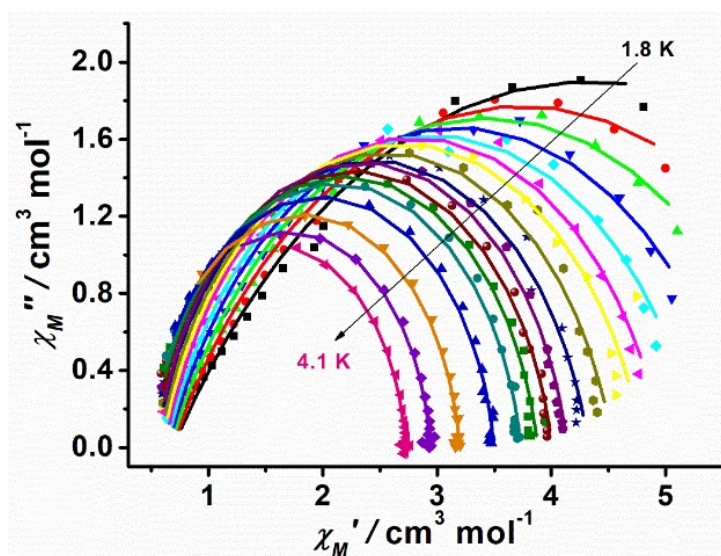

**Figure S5** Cole-Cole plot obtained from the ac susceptibility under 0.4 kOe dc field.

**Table S4** The parameters obtained by fitting Cole-Cole plot under 0.4 kOe dc field for **1**.

| T / K | $\chi_s$ | $\chi_T$ | $\tau$   | $a$  |
|-------|----------|----------|----------|------|
| 1.8   | 0.692    | 7.96     | 0.1264   | 0.39 |
| 1.9   | 0.684    | 6.79     | 0.06484  | 0.33 |
| 2.0   | 0.664    | 6.19     | 0.04015  | 0.29 |
| 2.1   | 0.644    | 5.70     | 0.02535  | 0.26 |
| 2.2   | 0.630    | 5.30     | 0.01725  | 0.23 |
| 2.3   | 0.616    | 4.99     | 0.01175  | 0.19 |
| 2.4   | 0.591    | 4.81     | 0.008418 | 0.18 |
| 2.5   | 0.566    | 4.54     | 0.005945 | 0.16 |
| 2.6   | 0.544    | 4.33     | 0.004328 | 0.15 |
| 2.7   | 0.553    | 4.14     | 0.003198 | 0.12 |
| 2.8   | 0.518    | 4.01     | 0.002389 | 0.12 |
| 2.9   | 0.511    | 3.88     | 0.001817 | 0.11 |
| 3.0   | 0.497    | 3.73     | 0.001399 | 0.11 |
| 3.2   | 0.476    | 3.50     | 0.000860 | 0.09 |
| 3.5   | 0.466    | 3.20     | 0.000438 | 0.08 |
| 3.8   | 0.469    | 2.94     | 0.000241 | 0.06 |
| 4.1   | 0.422    | 2.73     | 0.000136 | 0.06 |

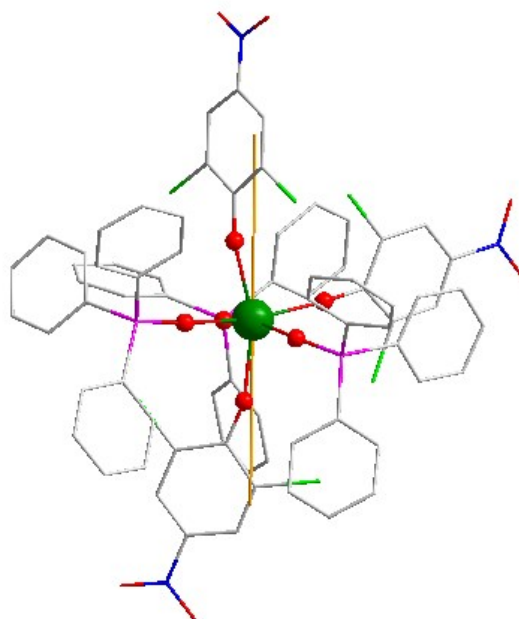

**Figure S6** The orientation of the magnetic easy axes (yellow) obtained according to an electrostatic model for **1**.
